# Supplementary material
Source: PubMed Central journal article supplement (PMC5980696)
Supplement: NIHMS941922-supplement-Supp_FigS2.pdf [file NIHMS941922-supplement-Supp_FigS2.pdf]

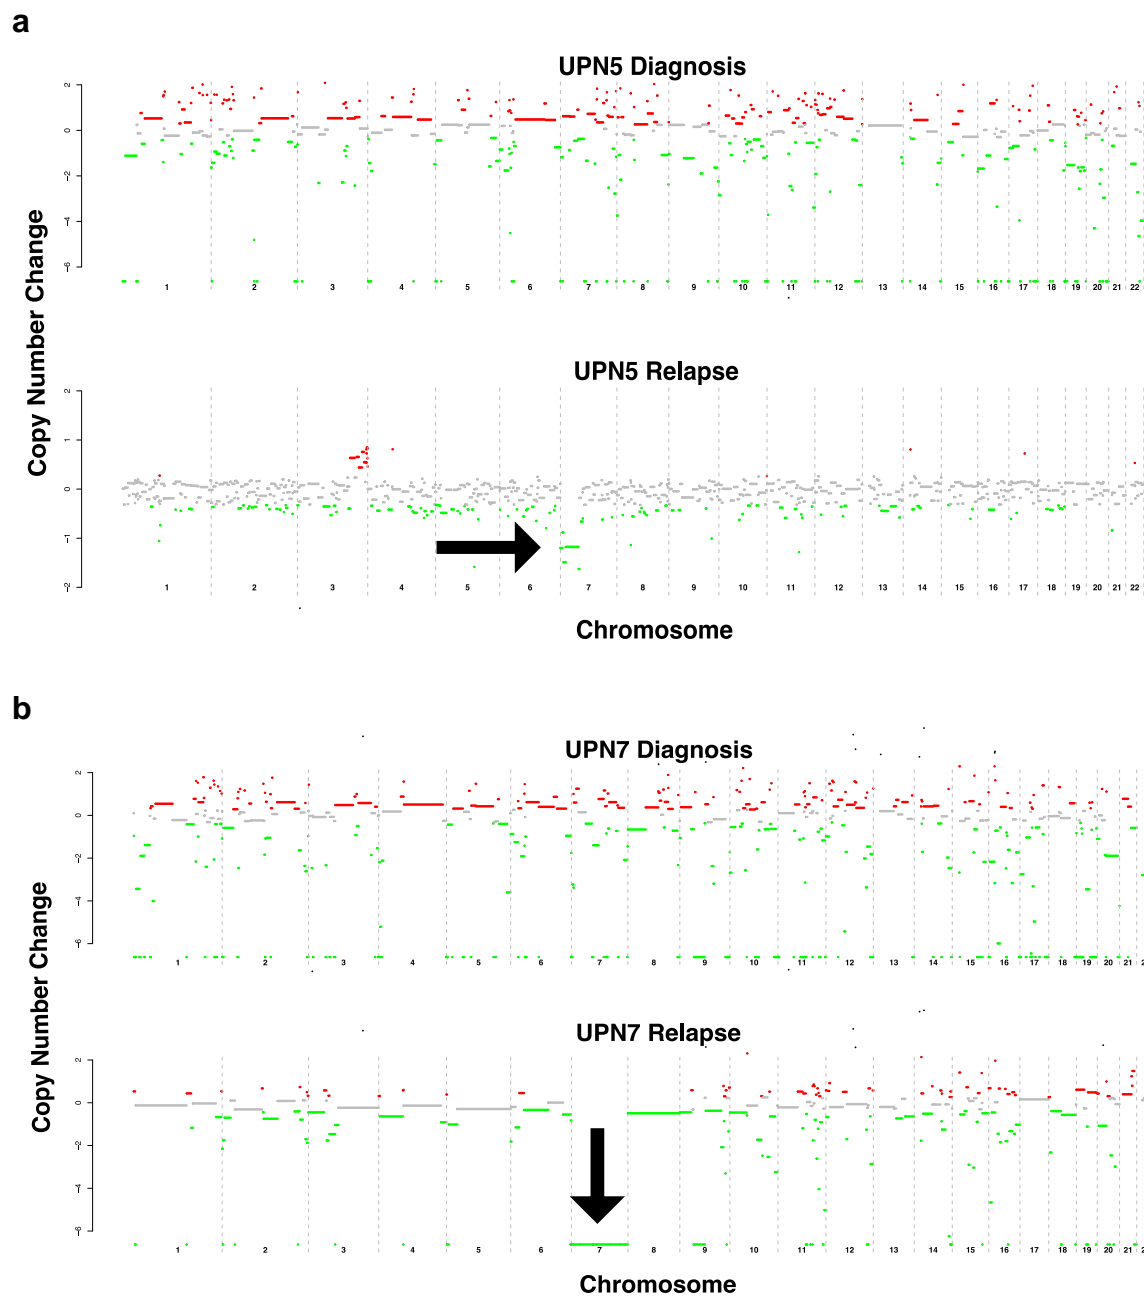

Chromosomes are plotted on the X-axis and copy number changes on the Y-axis. Amplifications are depicted in red, deletions in green and copy neutrality in grey. (a) Patient UPN5 has two copies of chromosome 7 at diagnosis but has a 7p deletion at relapse (horizontal black arrow), as well as a new 3q amplification. (b) Patient UPN7 has two copies of chromosome 7 at diagnosis but has monosomy 7 at relapse (vertical black arrow).
