# Supplementary material
Source: PubMed Central journal article supplement (PMC5980696)

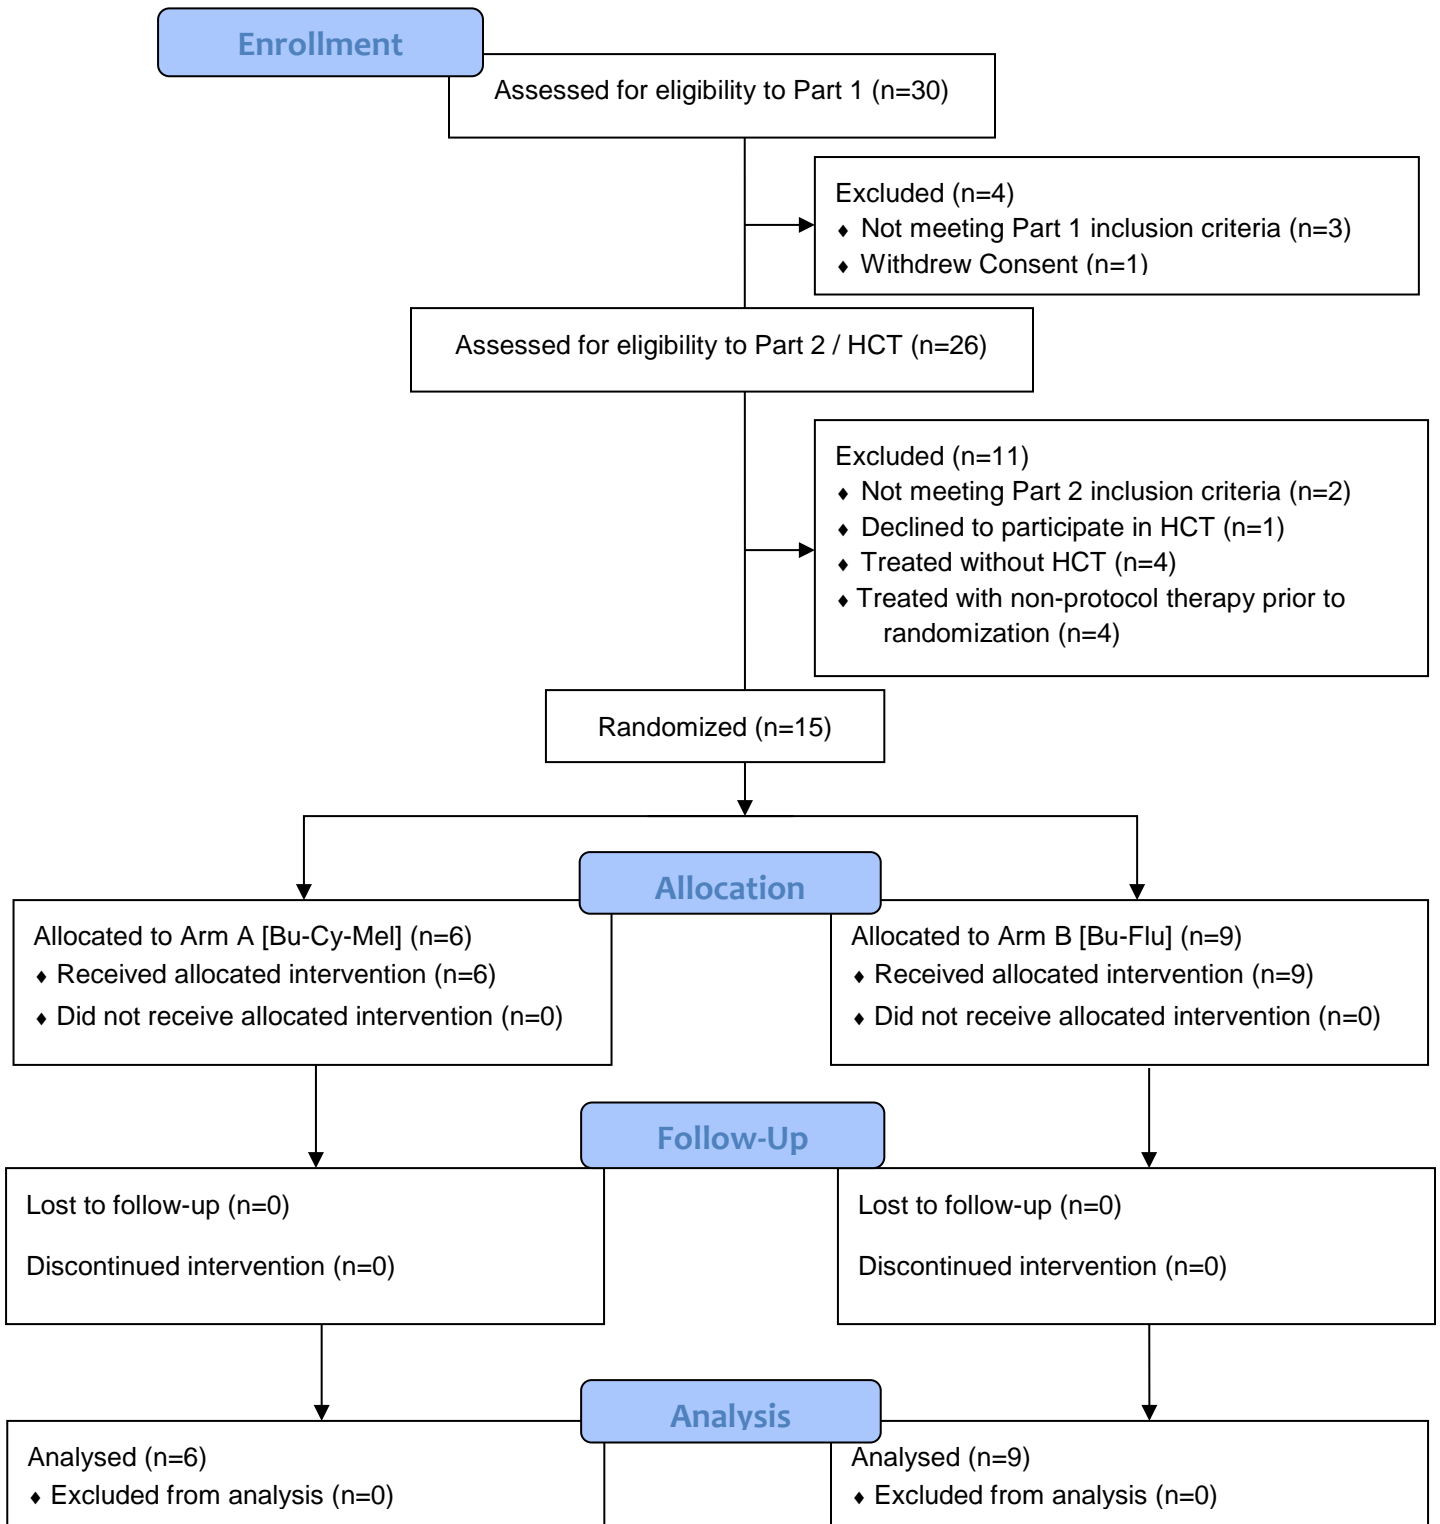

Supplement: NIHMS941922-supplement-Supp_FigS1.pdf [file NIHMS941922-supplement-Supp_FigS1.pdf]
